# Supplementary material for: New polymorphic phase of arachidic acid crystal: structure, intermolecular interactions, low-temperature stability and Raman spectroscopy combined with DFT calculations
Source: Royal Society of Chemistry journal article supplement (doi:10.1039/d3ra05388a), 2023-01-01
Supplement: d3ra05388a1.pdf [file d3ra05388a1.pdf]

## Supplementary information

---

### **New polymorphic phase of arachidic-acid crystal: structural, intermolecular interactions, low-temperature stability and Raman spectroscopy combined with DFT calculations**

Luanny M. B. Cardoso,<sup>a</sup> João G. de Oliveira Neto,<sup>b</sup> Gilberto D. Saraiva,<sup>c</sup> Fábio F. Leite,<sup>d</sup> Alejandro. P. Ayala,<sup>e</sup> Adenilson O. dos Santos,<sup>a</sup> and Francisco F. de Sousa<sup>a,b,\*</sup>

<sup>a</sup>Institute of Exact and Natural Sciences, Federal University of Para - UFPA, Belém, Pará, CEP 66075-110, Brazil

<sup>b</sup>Center for Social Sciences, Health, and Technology, Federal University of Maranhao - UFMA, Imperatriz, Maranhão, CEP 65900-410, Brazil

<sup>c</sup>Physics Course, State University of Ceara-UECE, Campus FECLESC, Quixadá, Ceará, CEP 63900-000, Brazil

<sup>d</sup>Department of Exact and Technological Sciences, Federal University of Amapá - UNIFAP, Macapá, Amapá, CEP 68903-419, Brazil

<sup>e</sup>Department of Physics, Federal University of Ceara - UFC, Fortaleza, CE 65455-900, Brazil

---

\*Corresponding author: ffs@ufpa.br (F. F. Sousa)

**Table S1.** Fractional atomic coordinates ( $\times 10^4$ ) and equivalent isotropic displacement parameters ( $\text{\AA}^2 \times 10^3$ ) for the AA crystal at 100 K and 300 K.  $U_{\text{eq}}$  is defined as 1/3 of the trace of the orthogonalized  $U_{\text{IJ}}$  tensor.

| Atom | 100 K     |            |          |                | 300 K     |         |          |                |
|------|-----------|------------|----------|----------------|-----------|---------|----------|----------------|
|      | $x$       | $y$        | $z$      | $U(\text{eq})$ | $x$       | $y$     | $z$      | $U(\text{eq})$ |
| O1   | 4675.2(2) | 4210.9(17) | 10386(2) | 18.9(3)        | 4677.6(4) | 4230(3) | 10388(4) | 60.9(7)        |
| O2   | 4914.2(2) | 6341.6(17) | 12612(2) | 19.7(3)        | 4910.7(4) | 6306(3) | 12556(4) | 64.8(8)        |
| C1   | 4696.5(3) | 5263(2)    | 12134(3) | 16.5(4)        | 4695.9(6) | 5252(5) | 12103(6) | 50.3(9)        |
| C4   | 4037.3(3) | 5398(2)    | 11265(3) | 15.8(4)        | 4040.5(6) | 5387(4) | 11195(6) | 46.5(8)        |
| C6   | 3573.5(3) | 5418(2)    | 8836(3)  | 16.0(4)        | 3576.7(6) | 5400(4) | 8757(6)  | 45.4(8)        |
| C2   | 4482.4(3) | 5462(2)    | 13989(3) | 17.5(4)        | 3287.8(6) | 4607(4) | 8443(6)  | 47.2(8)        |
| C8   | 3107.0(3) | 5424(2)    | 6463(3)  | 15.9(4)        | 3751.1(6) | 4577(4) | 10829(6) | 46.6(8)        |
| C5   | 3748.5(3) | 4558(2)    | 10930(3) | 15.9(4)        | 2822.8(6) | 4606(4) | 6086(6)  | 48.6(8)        |
| C7   | 3283.6(3) | 4587(2)    | 8561(3)  | 16.3(4)        | 3111.0(6) | 5403(4) | 6367(6)  | 46.3(8)        |
| C3   | 4208.0(3) | 4492(2)    | 13361(3) | 16.7(4)        | 4210.5(6) | 4507(5) | 13261(6) | 50.0(8)        |
| C10  | 2639.4(3) | 5417(2)    | 4113(3)  | 15.7(4)        | 2356.3(6) | 4608(4) | 3731(6)  | 50.6(8)        |
| C12  | 2171.8(3) | 5418(2)    | 1774(3)  | 16.2(4)        | 2644.3(6) | 5395(4) | 4007(6)  | 48.8(8)        |
| C9   | 2817.4(3) | 4589(2)    | 6208(3)  | 16.1(4)        | 2177.3(6) | 5394(5) | 1661(6)  | 50.6(8)        |
| C13  | 1881.1(3) | 4589(2)    | 1538(3)  | 16.0(4)        | 1888.2(6) | 4618(5) | 1392(6)  | 53.3(9)        |
| C11  | 2349.5(3) | 4588(2)    | 3866(3)  | 16.4(4)        | 1708.2(6) | 5387(5) | -663(6)  | 52.8(9)        |
| C15  | 1412.6(3) | 4590(2)    | -788(3)  | 16.5(4)        | 4485.2(6) | 5426(5) | 13905(6) | 55.1(9)        |
| C14  | 1703.7(3) | 5421(2)    | -553(3)  | 16.4(4)        | 1419.9(6) | 4616(5) | -921(6)  | 55.8(9)        |
| C17  | 943.1(4)  | 4589(2)    | -3081(3) | 17.8(4)        | 950.9(7)  | 4612(5) | -3195(6) | 60.7(10)       |
| C16  | 1233.6(3) | 5423(2)    | -2868(3) | 17.1(4)        | 1238.4(6) | 5384(5) | -2959(6) | 56.3(9)        |
| C18  | 762.1(4)  | 5411(2)    | -5150(3) | 19.3(4)        | 764.8(7)  | 5374(5) | -5223(7) | 63.6(10)       |
| C19  | 473.4(4)  | 4555(3)    | -5367(3) | 22.2(4)        | 479.5(7)  | 4584(6) | -5444(7) | 78.8(13)       |
| C20  | 290.2(4)  | 5389(3)    | -7418(4) | 28.2(5)        | 293.0(9)  | 5353(7) | -7452(9) | 97.7(15)       |

**Table S2.** Anisotropic displacement parameters ( $\text{\AA}^2 \times 10^3$ ) for the AA crystal at 100 K. The Anisotropic displacement factor exponent is  $-2\pi^2[h^2a^*U_{11}+2hka^*b^*U_{12}+\dots]$ .

| Atom | $U_{11}$ | $U_{22}$ | $U_{33}$ | $U_{23}$ | $U_{13}$ | $U_{12}$ |
|------|----------|----------|----------|----------|----------|----------|
| O1   | 20.3(6)  | 18.6(6)  | 17.8(7)  | -5.1(5)  | 0.4(5)   | 0.2(5)   |
| O2   | 18.7(6)  | 22.4(7)  | 18.2(7)  | -4.2(5)  | 2.7(5)   | -4.0(5)  |
| C1   | 17.8(9)  | 15.4(8)  | 16.0(9)  | 2.8(6)   | -2.4(6)  | 1.3(6)   |
| C4   | 13.9(8)  | 15.8(8)  | 17.6(9)  | 0.3(6)   | -0.5(6)  | 0.3(6)   |
| C6   | 14.2(8)  | 16.8(9)  | 16.9(9)  | 0.8(6)   | -1.3(6)  | -0.8(6)  |
| C2   | 15.8(8)  | 22.9(9)  | 13.5(8)  | -1.3(7)  | -1.6(6)  | -0.3(6)  |
| C8   | 15.4(8)  | 17.0(9)  | 15.1(9)  | 0.8(6)   | -1.6(6)  | -0.5(6)  |
| C5   | 15.2(8)  | 17.3(9)  | 15.0(8)  | 1.0(6)   | -0.1(6)  | 0.1(6)   |
| C7   | 14.5(8)  | 17.9(9)  | 16.3(9)  | 0.6(6)   | -0.4(6)  | -0.3(6)  |
| C3   | 15.5(8)  | 20.6(9)  | 14.0(9)  | 1.9(6)   | 0.7(6)   | 0.2(6)   |
| C10  | 15.4(8)  | 16.7(9)  | 14.7(8)  | 1.2(6)   | -1.5(6)  | 0.4(6)   |
| C12  | 16.8(8)  | 17.7(9)  | 14.0(9)  | 0.9(6)   | -1.0(6)  | -0.3(6)  |
| C9   | 14.6(8)  | 17.5(9)  | 16.0(9)  | 0.2(6)   | -2.0(6)  | 0.6(6)   |
| C13  | 17.2(8)  | 16.9(9)  | 13.7(9)  | 1.0(6)   | -1.9(6)  | -0.2(6)  |
| C11  | 16.2(8)  | 17.4(9)  | 15.5(9)  | 0.5(6)   | -1.6(6)  | 0.1(6)   |
| C15  | 17.7(8)  | 16.5(9)  | 15.0(9)  | 1.0(6)   | -1.7(6)  | -0.5(6)  |
| C14  | 16.8(8)  | 17.9(9)  | 14.3(9)  | 1.5(6)   | -1.6(6)  | -0.6(6)  |
| C17  | 19.7(9)  | 17.6(9)  | 15.8(9)  | 1.3(7)   | -1.8(7)  | -0.5(6)  |
| C16  | 17.3(8)  | 18.8(9)  | 15.1(9)  | 2.3(6)   | -1.1(6)  | 0.0(6)   |
| C18  | 19.1(9)  | 21.4(9)  | 16.9(9)  | 1.4(7)   | -1.9(7)  | 0.6(7)   |
| C19  | 21.3(9)  | 25.6(10) | 19.3(10) | 1.9(7)   | -2.1(7)  | -0.3(7)  |
| C20  | 22.4(10) | 37.1(12) | 24.5(11) | 0.7(8)   | -5.6(8)  | 1.3(8)   |

**Table S3.** Anisotropic displacement parameters ( $\text{\AA}^2 \times 10^3$ ) for the AA crystal at 300 K. The Anisotropic displacement factor exponent is  $-2\pi^2[h^2a^{*2}U_{11}+2hka^*b^*U_{12}+\dots]$ .

| Atom | U <sub>11</sub> | U <sub>22</sub> | U <sub>33</sub> | U <sub>23</sub> | U <sub>13</sub> | U <sub>12</sub> |
|------|-----------------|-----------------|-----------------|-----------------|-----------------|-----------------|
| O2   | 50.5(14)        | 73.9(17)        | 58.9(16)        | -17.1(13)       | 8.7(11)         | -4.6(11)        |
| O1   | 54.6(14)        | 78.4(18)        | 62.3(17)        | -15.7(13)       | 12.2(11)        | -13.8(12)       |
| C1   | 41.8(18)        | 60(2)           | 49(2)           | 5.2(18)         | -3.5(14)        | 2.9(15)         |
| C4   | 39.3(16)        | 50(2)           | 50.1(19)        | -0.6(15)        | 1.7(14)         | -2.0(13)        |
| C6   | 41.3(16)        | 50(2)           | 44.8(18)        | 1.7(15)         | 0.3(13)         | 0.7(13)         |
| C7   | 41.1(16)        | 53(2)           | 47.0(19)        | 0.1(15)         | 0.6(13)         | -0.1(14)        |
| C5   | 41.8(17)        | 49(2)           | 48.5(19)        | 2.6(15)         | 3.2(14)         | -0.8(13)        |
| C9   | 43.2(17)        | 55(2)           | 47.2(19)        | 0.1(15)         | -3.2(14)        | 1.9(14)         |
| C8   | 41.6(17)        | 53(2)           | 43.6(18)        | 1.4(15)         | -1.3(13)        | 0.2(14)         |
| C3   | 42.0(17)        | 61(2)           | 47.1(19)        | 3.8(16)         | 6.3(14)         | -0.6(14)        |
| C11  | 45.2(18)        | 59(2)           | 46.4(19)        | -2.0(16)        | -3.8(14)        | 0.0(15)         |
| C10  | 45.3(17)        | 54(2)           | 47.1(19)        | 3.7(15)         | -1.6(14)        | -1.0(14)        |
| C12  | 45.7(18)        | 60(2)           | 45.1(19)        | 4.9(16)         | -1.9(14)        | -1.6(15)        |
| C13  | 49.2(19)        | 65(2)           | 45.2(19)        | 1.2(16)         | -3.8(15)        | -0.4(15)        |
| C14  | 47.6(18)        | 68(2)           | 42.7(19)        | 5.0(16)         | -2.5(14)        | 1.1(15)         |
| C2   | 44.1(18)        | 74(3)           | 47(2)           | -2.5(17)        | 1.5(15)         | -0.8(15)        |
| C15  | 48.8(19)        | 73(3)           | 45(2)           | 2.5(17)         | -3.7(15)        | 0.1(16)         |
| C17  | 52(2)           | 77(3)           | 52(2)           | 1.3(18)         | -4.3(16)        | 2.2(17)         |
| C16  | 47.3(19)        | 73(3)           | 47(2)           | 3.8(17)         | -3.1(15)        | 1.0(16)         |
| C18  | 52(2)           | 82(3)           | 56(2)           | 0.9(19)         | -4.7(16)        | 1.7(18)         |
| C19  | 56(2)           | 110(4)          | 69(3)           | 4(2)            | -6.5(19)        | -3(2)           |
| C20  | 66(3)           | 142(4)          | 83(3)           | 6(3)            | -16(2)          | 4(3)            |

**Table S4.** Bond lengths for AA crystal at 100 K and 300 K.

|      |      | 100 K                   | 300 K    |      |      | 100 K                   | 300 K    |
|------|------|-------------------------|----------|------|------|-------------------------|----------|
| Atom | Atom | Length ( $\text{\AA}$ ) |          | Atom | Atom | Length ( $\text{\AA}$ ) |          |
| O1   | C1   | 1.225(2)                | 1.314(4) | C10  | C11  | 1.525(2)                | 1.513(4) |
| O2   | C1   | 1.323(2)                | 1.221(4) | C12  | C13  | 1.528(2)                | 1.514(4) |
| C1   | C2   | 1.500(2)                | 1.481(5) | C12  | C11  | 1.527(2)                | 1.522(4) |
| C4   | C5   | 1.525(2)                | 1.528(4) | C13  | C14  | 1.527(2)                | 1.514(4) |
| C4   | C3   | 1.534(2)                | 1.527(4) | C15  | C14  | 1.530(2)                | 1.509(4) |
| C6   | C5   | 1.530(2)                | 1.522(4) | C15  | C16  | 1.527(2)                | 1.511(4) |
| C6   | C7   | 1.526(2)                | 1.519(4) | C17  | C16  | 1.528(2)                | 1.505(4) |
| C2   | C3   | 1.524(2)                | 1.520(4) | C17  | C18  | 1.525(2)                | 1.517(5) |
| C8   | C7   | 1.529(2)                | 1.522(4) | C18  | C19  | 1.526(2)                | 1.500(5) |
| C8   | C9   | 1.525(2)                | 1.516(4) | C19  | C20  | 1.527(2)                | 1.513(5) |
| C10  | C9   | 1.529(2)                | 1.525(4) |      |      |                         |          |

**Table S5.** Bond angles for AA crystal at 100 and 300 K.

|       |     |    | 100 K              | 300 K    |       |     |     | 100 K              | 300 K    |
|-------|-----|----|--------------------|----------|-------|-----|-----|--------------------|----------|
| Atoms |     |    | Angle ( $^\circ$ ) |          | Atoms |     |     | Angle ( $^\circ$ ) |          |
| O1    | C1  | O2 | 123.47(16)         | 122.7(3) | C11   | C12 | C13 | 113.42(14)         | 114.5(3) |
| O1    | C1  | C2 | 124.25(15)         | 112.8(3) | C8    | C9  | C10 | 113.64(14)         | 114.1(3) |
| O2    | C1  | C2 | 112.27(14)         | 124.6(3) | C14   | C13 | C12 | 113.36(14)         | 115.0(3) |
| C5    | C4  | C3 | 112.53(14)         | 112.7(3) | C10   | C11 | C12 | 113.55(14)         | 114.4(3) |
| C7    | C6  | C5 | 113.11(14)         | 113.7(3) | C16   | C15 | C14 | 113.55(14)         | 115.2(3) |
| C1    | C2  | C3 | 115.18(14)         | 115.4(3) | C13   | C14 | C15 | 113.30(14)         | 114.9(3) |
| C9    | C8  | C7 | 113.30(14)         | 113.8(3) | C18   | C17 | C16 | 113.66(14)         | 115.6(3) |
| C4    | C5  | C6 | 113.88(14)         | 114.2(3) | C15   | C16 | C17 | 113.13(14)         | 114.8(3) |
| C6    | C7  | C8 | 113.69(14)         | 114.5(3) | C17   | C18 | C19 | 113.32(15)         | 115.0(3) |
| C2    | C3  | C4 | 114.34(14)         | 114.6(3) | C18   | C19 | C20 | 113.51(15)         | 115.0(4) |
| C11   | C10 | C9 | 113.60(14)         | 114.2(3) |       |     |     |                    |          |

**Table S6.** Hydrogen bonds for the AA crystal at 100 and 300 K.

| Temperature (K) | D  | H  | A               | d(D-H) (Å) | d(H-A) (Å) | d(D-A) (Å) | D-H-A (°) |
|-----------------|----|----|-----------------|------------|------------|------------|-----------|
| 100             | O1 | H1 | O2 <sup>1</sup> | 0.84       | 1.84       | 2.679(4)   | 173.9     |
| 300             | O1 | H1 | O2 <sup>1</sup> | 0.82       | 1.88       | 2.689(3)   | 171.2     |

<sup>1</sup>*I-x, I-y, 2-z***Table S7.** Torsion angles for the AA crystal at 100 K.

| A   | B   | C   | D   | Angle (°)   | A   | B   | C   | D   | Angle (°)   |
|-----|-----|-----|-----|-------------|-----|-----|-----|-----|-------------|
| O1  | C1  | C2  | C3  | -9.6(2)     | C9  | C10 | C11 | C12 | 179.94(14)  |
| O2  | C1  | C2  | C3  | 171.11(14)  | C13 | C12 | C11 | C10 | -179.81(13) |
| C1  | C2  | C3  | C4  | -69.70(19)  | C11 | C10 | C9  | C8  | -179.72(13) |
| C5  | C4  | C3  | C2  | -171.96(14) | C11 | C12 | C13 | C14 | 179.95(14)  |
| C5  | C6  | C7  | C8  | -179.60(14) | C14 | C15 | C16 | C17 | -179.78(14) |
| C7  | C6  | C5  | C4  | -178.88(13) | C17 | C18 | C19 | C20 | 179.33(15)  |
| C7  | C8  | C9  | C10 | -179.95(14) | C16 | C15 | C14 | C13 | 179.72(14)  |
| C3  | C4  | C5  | C6  | -179.42(13) | C16 | C17 | C18 | C19 | 179.36(14)  |
| C12 | C13 | C14 | C15 | -179.99(13) | C18 | C17 | C16 | C15 | 179.93(14)  |
| C9  | C8  | C7  | C6  | -179.82(14) |     |     |     |     |             |

**Table S8.** Torsion angles for the AA crystal at 300 K.

| A   | B   | C   | D   | Angle (°) | A   | B   | C   | D   | Angle (°) |
|-----|-----|-----|-----|-----------|-----|-----|-----|-----|-----------|
| O1  | C1  | C2  | C3  | 169.5(3)  | C9  | C10 | C11 | C12 | 179.9(3)  |
| O2  | C1  | C2  | C3  | -11.4(5)  | C13 | C12 | C11 | C10 | -179.6(3) |
| C1  | C2  | C3  | C4  | -69.1(4)  | C11 | C10 | C9  | C8  | -179.7(3) |
| C5  | C4  | C3  | C2  | -172.4(4) | C11 | C12 | C13 | C14 | -179.9(3) |
| C5  | C6  | C7  | C8  | -179.5(5) | C14 | C15 | C16 | C17 | -179.7(3) |
| C7  | C6  | C5  | C4  | -178.9(2) | C17 | C18 | C19 | C20 | 179.5(3)  |
| C7  | C8  | C9  | C10 | -180.0(3) | C16 | C15 | C14 | C13 | 179.7(3)  |
| C3  | C4  | C5  | C6  | -179.1(3) | C16 | C17 | C18 | C19 | 179.6(3)  |
| C12 | C13 | C14 | C15 | -179.8(3) | C18 | C17 | C16 | C15 | 179.6(3)  |
| C9  | C8  | C7  | C6  | -179.7(3) |     |     |     |     |           |

**Table S9.** Hydrogen atom coordinates (Å×10<sup>4</sup>) and isotropic displacement parameters (Å<sup>2</sup>×10<sup>3</sup>) for the AA crystal at 100 K.

| Atom | x       | y       | z        | U(eq) |
|------|---------|---------|----------|-------|
| H2   | 5034.63 | 6125.61 | 11604.92 | 30    |
| H4A  | 4021.04 | 6756.02 | 11577.42 | 19    |
| H4B  | 4135.38 | 5238.02 | 9748.79  | 19    |
| H6A  | 3558.55 | 6782.45 | 9103.7   | 19    |
| H6B  | 3668.59 | 5224.86 | 7310.27  | 19    |
| H2A  | 4446.56 | 6810.41 | 14231.72 | 21    |
| H2B  | 4559.06 | 4953.36 | 15546.61 | 21    |
| H8A  | 3091.64 | 6790.19 | 6711.59  | 19    |
| H8B  | 3201.35 | 5219.28 | 4936.23  | 19    |
| H5A  | 3650.91 | 4727.75 | 12447.82 | 19    |
| H5B  | 3765.8  | 3197.49 | 10643.72 | 19    |
| H7A  | 3188.64 | 4786.98 | 10085.87 | 20    |
| H7B  | 3299.11 | 3220.8  | 8309     | 20    |
| H3A  | 4096.68 | 4487.01 | 14816.52 | 20    |
| H3B  | 4245.22 | 3174.14 | 12934.96 | 20    |
| H10A | 2624.5  | 6784.37 | 4352.88  | 19    |
| H10B | 2733.03 | 5206.23 | 2583.22  | 19    |

|      |         |         |          |    |
|------|---------|---------|----------|----|
| H12A | 2264.95 | 5204.38 | 243.21   | 19 |
| H12B | 2157.3  | 6785.6  | 2013.47  | 19 |
| H9A  | 2723.29 | 4793.62 | 7736.27  | 19 |
| H9B  | 2833.03 | 3221.96 | 5963.43  | 19 |
| H13A | 1895.53 | 3220.78 | 1296.45  | 19 |
| H13B | 1787.94 | 4800.87 | 3068.89  | 19 |
| H11A | 2255.88 | 4797    | 5396.28  | 20 |
| H11B | 2364.34 | 3220.28 | 3624     | 20 |
| H15A | 1427.25 | 3222.44 | -1035.26 | 20 |
| H15B | 1320.05 | 4795.97 | 747.88   | 20 |
| H14A | 1796.76 | 5208.34 | -2084.65 | 20 |
| H14B | 1689.19 | 6788.65 | -312.21  | 20 |
| H17A | 958.05  | 3221.26 | -3322.02 | 21 |
| H17B | 851.92  | 4798.25 | -1539.04 | 21 |
| H16A | 1325.38 | 5211.3  | -4406.56 | 21 |
| H16B | 1219.12 | 6790.51 | -2625.46 | 21 |
| H18A | 854.01  | 5213.74 | -6690.72 | 23 |
| H18B | 745.08  | 6776.2  | -4899.45 | 23 |
| H19A | 382.47  | 4738.34 | -3818.28 | 27 |
| H19B | 490.5   | 3191.62 | -5635.46 | 27 |
| H20A | 377.12  | 5196.11 | -8963.22 | 42 |
| H20B | 266.86  | 6732.31 | -7138.51 | 42 |
| H20C | 109.19  | 4775.35 | -7469.3  | 42 |

**Table S10.** Hydrogen atom coordinates ( $\text{\AA}\times 10^4$ ) and isotropic displacement parameters ( $\text{\AA}^2\times 10^3$ ) for the AA crystal at 300 K.

| Atom | <i>x</i> | <i>y</i> | <i>Z</i> | U(eq) |
|------|----------|----------|----------|-------|
| H1   | 5034.17  | 6027.44  | 11683.89 | 97    |
| H4A  | 4136.78  | 5242.35  | 9734.56  | 56    |
| H4B  | 4024.63  | 6670.72  | 11505.61 | 56    |
| H6A  | 3562.11  | 6691.25  | 9016.04  | 54    |
| H6B  | 3670.46  | 5218.95  | 7291.05  | 54    |
| H7A  | 3194.19  | 4795.91  | 9908.73  | 57    |
| H7B  | 3303.01  | 3313.94  | 8202.98  | 57    |
| H5A  | 3768.21  | 3288.66  | 10552.62 | 56    |
| H5B  | 3655.2   | 4735.79  | 12287.69 | 56    |
| H9A  | 2730.55  | 4802.12  | 7556.29  | 58    |
| H9B  | 2838.07  | 3311.75  | 5855.22  | 58    |
| H8A  | 3095.97  | 6697.34  | 6600.7   | 56    |
| H8B  | 3203.47  | 5207.51  | 4897.54  | 56    |
| H3A  | 4101.74  | 4503.44  | 14662.32 | 60    |
| H3B  | 4245.64  | 3258.98  | 12846.05 | 60    |
| H11A | 2264.66  | 4807.07  | 5203.47  | 61    |
| H11B | 2370.96  | 3313.15  | 3502.46  | 61    |
| H10A | 2629.85  | 6690.82  | 4234.39  | 59    |
| H10B | 2736.27  | 5194.86  | 2536.32  | 59    |
| H12A | 2163.97  | 6690.33  | 1882.44  | 61    |
| H12B | 2268.36  | 5186.73  | 186.68   | 61    |
| H13A | 1901.92  | 3321.22  | 1175.53  | 64    |
| H13B | 1797.48  | 4825.99  | 2867.46  | 64    |
| H14A | 1694.93  | 6684.21  | -450.1   | 63    |
| H14B | 1798.51  | 5174.77  | -2139.72 | 63    |
| H2A  | 4451.2   | 6701.16  | 14163.27 | 66    |
| H2B  | 4560.62  | 4926.76  | 15406.05 | 66    |
| H15A | 1330.28  | 4821.01  | 560.67   | 67    |
| H15B | 1433.44  | 3319.24  | -1141.32 | 67    |
| H17A | 863.19   | 4814.93  | -1703.93 | 73    |
| H17B | 964.81   | 3315.93  | -3416.05 | 73    |

|      |         |         |          |     |
|------|---------|---------|----------|-----|
| H16A | 1225.09 | 6680.65 | -2743.93 | 68  |
| H16B | 1327.21 | 5172.82 | -4443.33 | 68  |
| H18A | 749.27  | 6669.12 | -4998.12 | 76  |
| H18B | 852.42  | 5177.25 | -6715.63 | 76  |
| H19A | 392.47  | 4771.46 | -3945.71 | 95  |
| H19B | 495.02  | 3290    | -5681.19 | 95  |
| H20A | 373.89  | 5145.37 | -8953.7  | 146 |
| H20B | 270.94  | 6628.6  | -7214.29 | 146 |
| H20C | 115.7   | 4773.84 | -7464.03 | 146 |

---

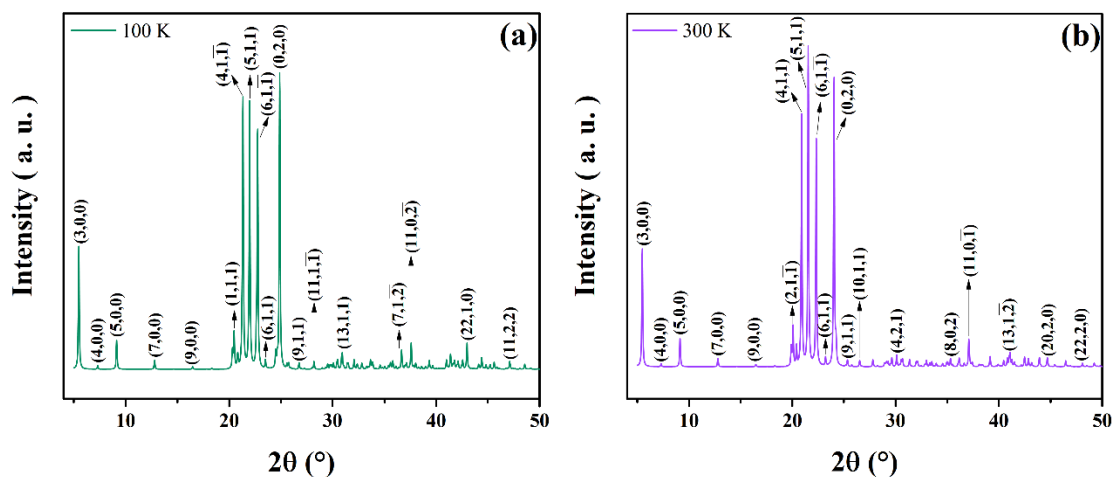

**Figure S1.** XRD patterns of AA single crystal in the  $B_m$  form at temperatures of (a) 100 K and (b) 300 K.

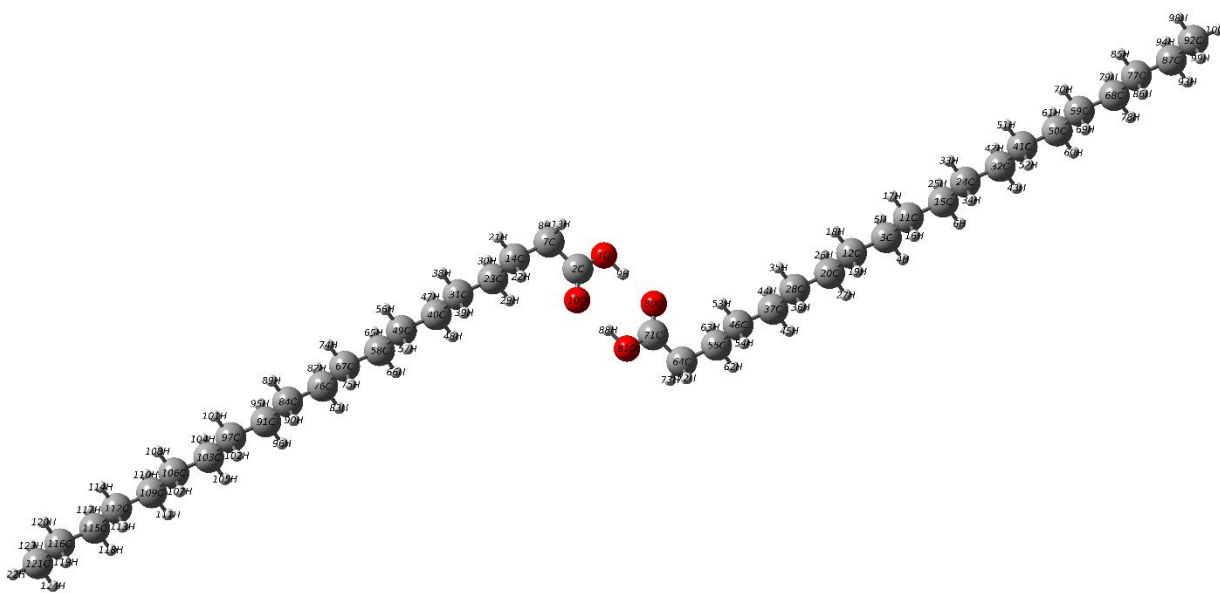

**Figure S2.** Dimer model for a pair of AA molecules used in the DFT calculations to obtain all intramolecular Raman-active modes. The gray and light gray balls represent carbon and hydrogen atoms, respectively. The red balls represent oxygen atoms.
